# Supplementary material for: Targeting RalGAPα1 in skeletal muscle to simultaneously improve postprandial glucose and lipid control
Source: PubMed Central journal article supplement — Sci Adv. 2019 Apr 3;5(4):eaav4116. doi: 10.1126/sciadv.aav4116 (PMC6459767; doi:10.1126/sciadv.aav4116), 2019-04-03
Supplement: aav4116_SM.pdf [file aav4116_SM.pdf]

## Supplementary Materials for

### Targeting RalGAP $\alpha$ 1 in skeletal muscle to simultaneously improve postprandial glucose and lipid control

Qiaoli Chen, Ping Rong, Sangsang Zhu, Xinyu Yang, Qian Ouyang, Hong Yu Wang, Shuai Chen\*

\*Corresponding author. Email: schen6@163.com, chenshuai@nicemice.cn

Published 3 April 2019, *Sci. Adv.* 5, eaav4116 (2019)

DOI: 10.1126/sciadv.aav4116

#### This PDF file includes:

Table S1. The list of antibodies used in this study.

Table S2. Primer information for quantitative real-time fluorescence PCR analysis of expression of target genes.

Fig. S1. Specificity of the pT735-RalGAP $\alpha$ 1 antibody.

Fig. S2. Effects of HFD/fatty acids on the RalGAP $\alpha$ 1/ $\beta$  complex and RalA/B activities in skeletal muscle and L6 myotubes.

Fig. S3. Generation and characterization of the RalGAP $\alpha$ 1<sup>Thr735Ala</sup> knock-in mice.

Fig. S4. Uptake of glucose and LCFAs and expression of genes for lipid metabolism in adipose tissues and primary adipocytes.

Fig. S5. Cell surface and total CD36 in L6 myotubes.

Fig. S6. Characterization of RalGAP $\alpha$ 1-mKO mice.

Fig. S7. Mapping of interaction domains on RalGAP $\alpha$ 1 and RalGAP $\beta$ .

Fig. S8. Expression, degradation, and interaction of RalGAP $\alpha$ 1 and RalGAP $\beta$  in L6 myotubes expressing  $\beta$ -blockatide.

**Table S1. The list of antibodies used in this study.**

| <b>Antibody Name</b>    | <b>Company</b>            | <b>Cat No.</b> |
|-------------------------|---------------------------|----------------|
| Rabbit anti-AS160       | Merck Millipore           | 07-741         |
| Rabbit anti-pT642-AS160 | Life Technologies         | 441071G        |
| Rabbit anti-pS2448-mTOR | Cell Signaling Technology | #5536          |
| Rabbit anti-mTOR        | Cell Signaling Technology | #2983          |
| Rabbit anti-PKB         | Cell Signaling Technology | #9272          |
| Rabbit anti-pS473-PKB   | Cell Signaling Technology | #9271          |
| Rabbit anti-pT308-PKB   | Cell Signaling Technology | #3038          |
| Rabbit anti-pT389-S6K   | Cell Signaling Technology | #9205          |
| Rabbit anti-S6K         | Cell Signaling Technology | #9202          |
| Rabbit anti-GSK3        | Cell Signaling Technology | #5676          |
| Rabbit anti-pS21/9-GSK3 | Cell Signaling Technology | #9331          |
| Rabbit anti-RalA        | Cell Signaling Technology | #4799          |
| Rabbit anti-HA          | Cell Signaling Technology | #3724          |
| Rabbit anti-CD36        | Abcam                     | ab133625       |
| Rabbit anti-GLUT4       | Abcam                     | ab654          |
| Rabbit anti-pS307-IRS1  | ABclonal                  | AP0371         |
| Rabbit anti-IRS1        | ABclonal                  | A0245          |
| Rabbit anti-RalB        | ABclonal                  | A4069          |
| Mouse anti-Flag         | Sigma                     | F9291          |
| Mouse anti-CD36         | Santa Cruz Biotechnology  | sc-7309        |
| Rabbit anti-GFP         | Santa Cruz Biotechnology  | sc-8334        |
| Mouse anti-GAPDH        | Santa Cruz Biotechnology  | sc-32233       |
| Mouse anti-Tubulin      | Santa Cruz Biotechnology  | sc-8035        |

**Table S2. Primer information for quantitative real-time fluorescence PCR analysis of expression of target genes.**

| Gene name         | Forward primer                | Reverse primer                  |
|-------------------|-------------------------------|---------------------------------|
| Cd36              | 5' -CACAGATGCAGCCTCCTTTC-3'   | 5' -AGCACACCATACGACGTACA-3'     |
| Fatp1             | 5' -CTACCACTCTGCAGGAACA-3'    | 5' -CAGGTAGCGGCAGATTTTAC-3'     |
| Fabp3             | 5' -CCCCTCAGCTCAGCACCAT-3'    | 5' -CAGAAAAATCCCAACCCAAGAAT-3'  |
| Acc1              | 5' -GCCTCTTCCTGACAAACGAG-3'   | 5' -TGACTGCCGAAACATCTCTG-3'     |
| Fasn              | 5' -GCTTCGCCAACTCTACCATG-3'   | 5' -CCATCGCTTCCAGGACAATG-3'     |
| Acl               | 5' -ACCGGCAAAGAACTCCTGTA-3'   | 5' -ATGTCCCAGGCGAGTTTTTA-3'     |
| AceCS1            | 5' -CTCCATTGTGTTTGCAGGCT-3'   | 5' -GTCATTCATGCCAGCTCTG-3'      |
| Pnpla2            | 5' -CAACGCCACTCACATCTACG-3'   | 5' -ACCAGGTTGAAGGAGGGATG-3'     |
| Srebp1a           | 5' -GATGTGCGAACTGGACACAG-3'   | 5' -CATAGGGGGCGTCAAACAG-3'      |
| Srebp1c           | 5' -TGTTGGCATCTGTATCTG-3'     | 5' -AGGGAAAGCTTTGGGGTCTA-3'     |
| Hmgcs1            | 5' -GCCGTGAACTGGGTGAA-3'      | 5' -GCATATATAGCAATGTCTCTGCAA-3' |
| Hmgcr             | 5' -CTTGTGGAATGCCTTGTGATTG-3' | 5' -AGCCGAAGCAGCACATGAT-3'      |
| PPAR $\alpha$     | 5' -CCACGAAGCCTACCTGAAGA-3'   | 5' -TTCTCGCCATACACAAGGT-3'      |
| Cpt1              | 5' -ACTCCTGGAAGAAGAAGTTCA-3'  | 5' -AGTATCTTTGACAGCTGGGAC-3'    |
| Acox1             | 5' -ATCACGGGCACTTATGC-3'      | 5' -TCTCACGGATAGGGACA-3'        |
| PPAR $\gamma$     | 5' -GAGAGGTCCACAGAGCTGATT-3'  | 5' -GATGTGCGAACTGGACACAG-3'     |
| Cebpa             | 5' -CAAGAACAGCAACGAGTACCG-3'  | 5' -GTCACTGGTCAACTCCAGCAC-3'    |
| RalGAP $\alpha$ 1 | 5' -ACAGAAAGGTCACAAGTCTCAA-3' | 5' -TCCTGAAGAGCTTGCAACCA-3'     |
| RalGAP $\alpha$ 2 | 5' -CAGGAGTGGAGAAGGCAAGA-3'   | 5' -TGGGGCTGTAACTTGAGAG-3'      |
| RalGAP $\beta$    | 5' -AAATCCAAGGAGCCACTGGA-3'   | 5' -GGCTCCAACCTGCTTATTCGG-3'    |
| RalA              | 5' -ACAGGATGGCTGCAAACAAG-3'   | 5' -TGAACCTGCAGAGTCAGAGCA-3'    |
| RalB              | 5' -CTTTCCCTCCTCAACACCCT-3'   | 5' -AGCCTTCCCTTCATCTGCTT-3'     |
| Cre               | 5' -GCCTGCATTACCGGTCGATGC-3'  | 5' -CAGGGTGTATAAGCAATCCC-3'     |
| actin             | 5' -GAGAGGGAAATCGTGCGTGACA-3' | 5' -GTTTCATGGATGCCACAGGAT-3'    |

## Supple. Fig. 1

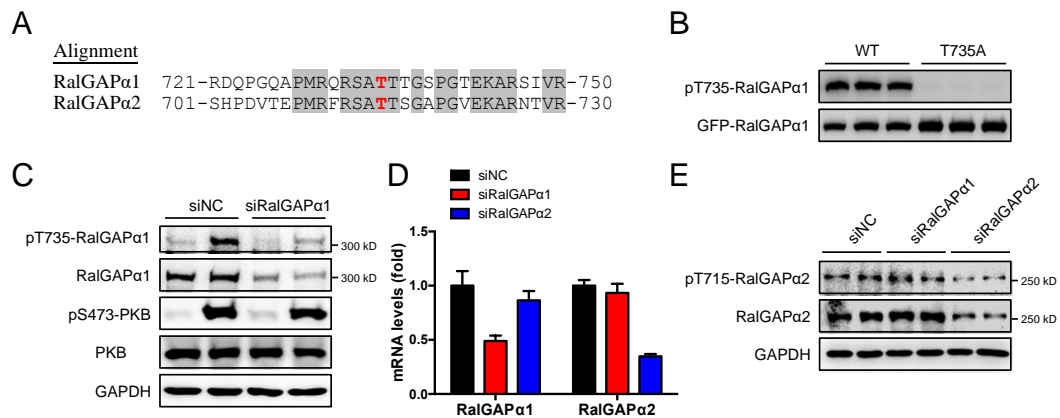

**Fig. S1. Specificity of the pT735-RalGAP $\alpha$ 1 antibody.** (A) Alignment of sequences surrounding RalGAP $\alpha$ 1-Thr<sup>735</sup> and RalGAP $\alpha$ 2-Thr<sup>715</sup>. RalGAP $\alpha$ 1-Thr<sup>735</sup> and RalGAP $\alpha$ 2-Thr<sup>715</sup> are highlighted in red. The pT715-RalGAP $\alpha$ 2 peptide (EPMRFRSApTTSGAPGV EK, Thr<sup>715</sup> highlighted in red) was used to raise phospho-specific antibody. (B) Phosphorylation of the GFP tagged RalGAP $\alpha$ 1<sup>E590-D1232</sup> WT and Thr735Ala mutant proteins were detected with the pT735-RalGAP $\alpha$ 1 antibody. (C) RalGAP $\alpha$ 1-Thr<sup>735</sup> phosphorylation in L6 myotubes upon knockdown of RalGAP $\alpha$ 1. Endogenous RalGAP $\alpha$ 1 runs at ~ 300 kD in cell lysates of L6 myotubes. (D) mRNA levels of RalGAP $\alpha$ 1 and RalGAP $\alpha$ 2 in primary mouse hepatocytes upon knockdown of these two genes, respectively. (E) RalGAP $\alpha$ 2-Thr<sup>715</sup> phosphorylation in primary mouse hepatocytes upon knockdown of RalGAP $\alpha$ 1 or RalGAP $\alpha$ 2. Endogenous RalGAP $\alpha$ 2 runs at ~ 260 kD in cell lysates of primary mouse hepatocytes.

Supple. Fig. 2

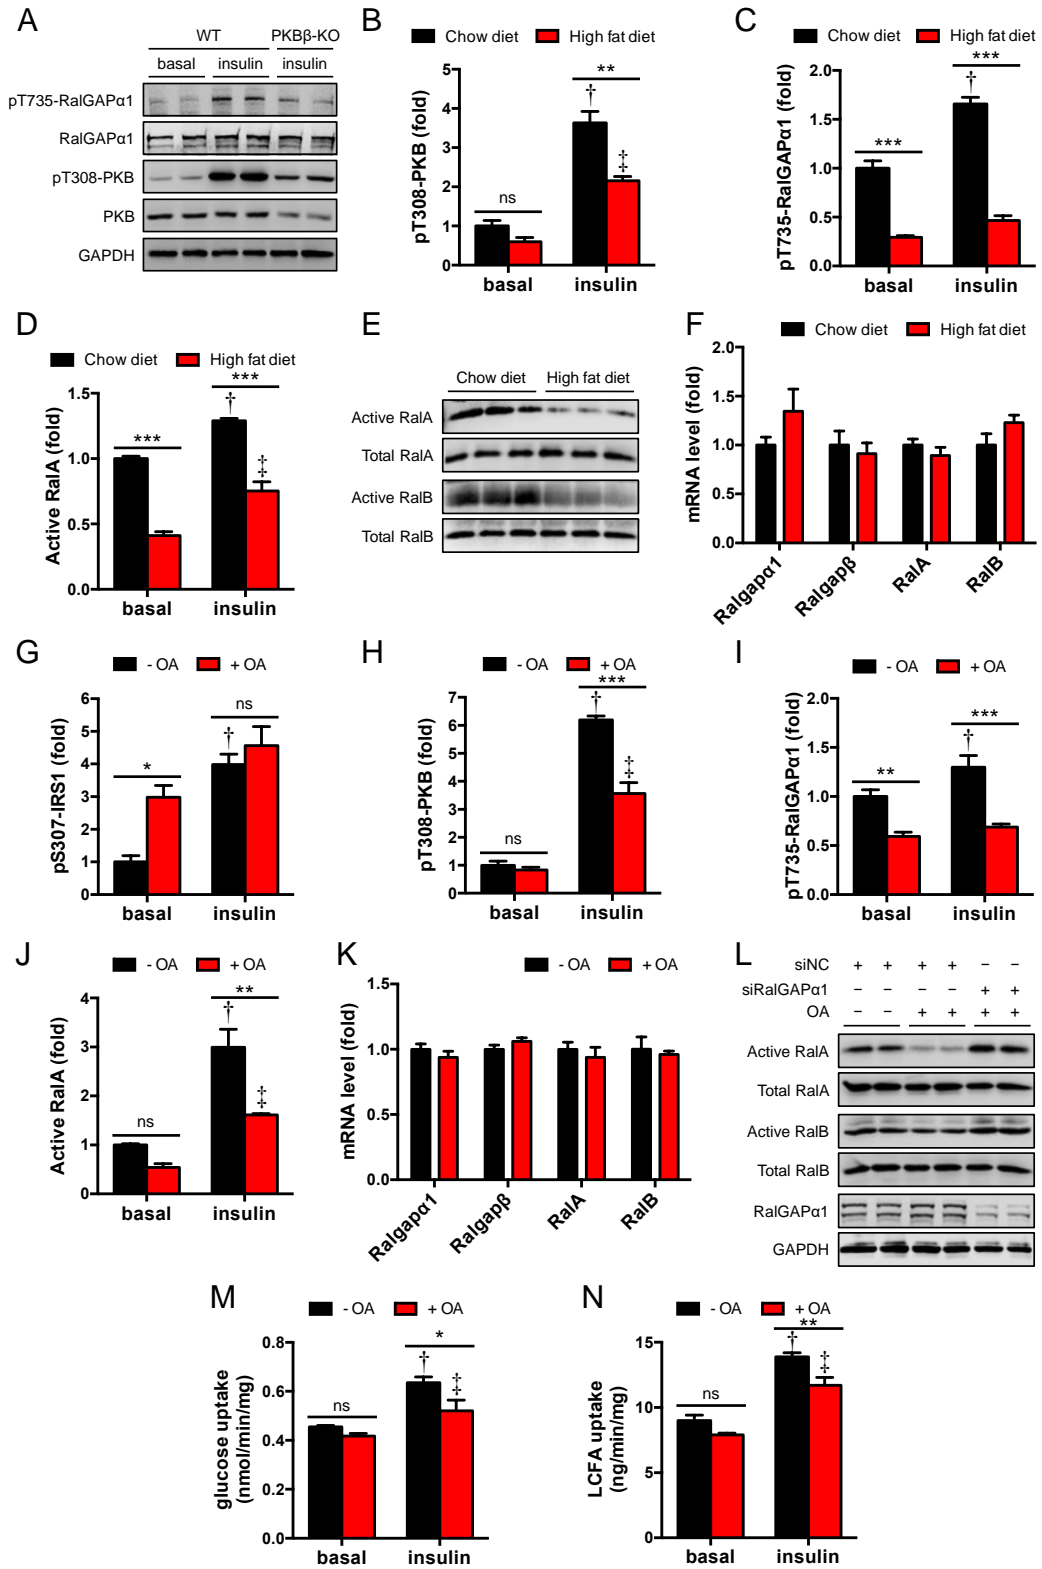

**Fig. S2. Effects of HFD/fatty acids on the RalGAP $\alpha$ 1/ $\beta$  complex and RalA/B activities in skeletal muscle and L6 myotubes.** (A) Thr<sup>735</sup> phosphorylation of RalGAP $\alpha$ 1 in gastrocnemius muscle from the wild-type and PKB $\beta$ -KO mice treated with insulin. (B) Quantitation of PKB-pT308 phosphorylation in soleus muscle of male DIO mice (5-month-old) in response to insulin. Representative blots were shown in Fig. 1A. n = 3. † indicates  $p < 0.001$  (Chow diet insulin vs Chow diet basal), and ‡ indicates  $p < 0.01$  (High fat diet insulin vs High fat diet basal). (C) Quantitation of RalGAP $\alpha$ 1-pT735 phosphorylation in soleus muscle of male DIO mice (5-month-old) in response to insulin. Representative blots were shown in Fig. 1A. n = 3. † indicates  $p < 0.001$  (Chow diet insulin vs Chow diet basal). (D) Quantitation of GTP-bound active RalA in soleus muscle of male DIO mice (5-month-old) in response to insulin. Representative blots were shown in Fig. 1A. n = 3. † indicates  $p < 0.01$  (Chow diet insulin vs Chow diet basal), and ‡ indicates  $p < 0.01$  (High fat diet insulin vs High fat diet basal). (E) Levels of GTP-bound active RalA and RalB in gastrocnemius muscle of *ad libitum* DIO male mice at the age of 5 months. (F) mRNA levels of RalGAP $\alpha$ 1/ $\beta$  and RalA/B in gastrocnemius muscle of *ad libitum* DIO male mice at the age of 5 months. n = 7-8. (G) Quantitation of IRS1-pS307 phosphorylation in OA-treated L6 myotubes in response to insulin. Representative blots were shown in Fig. 1B. n = 3. † indicates  $p < 0.01$  (- OA insulin vs - OA basal). (H) Quantitation of PKB-pT308 phosphorylation in OA-treated L6 myotubes in response to insulin. Representative blots were shown in Fig. 1B. n = 3. † and ‡ indicate  $p < 0.001$  (insulin vs basal). (I) Quantitation of RalGAP $\alpha$ 1-pT735 phosphorylation in OA-treated L6 myotubes in response to insulin. Representative blots were shown in Fig. 1B. n = 3. † indicates  $p < 0.05$  (- OA insulin vs - OA basal). (J) Quantitation of GTP-bound active RalA in OA-treated L6 myotubes in response to insulin. Representative blots were shown in Fig. 1B. n = 3. † indicates  $p < 0.001$  (- OA insulin vs - OA basal), and ‡ indicates  $p < 0.05$  (+ OA insulin vs + OA basal). (K) mRNA levels of RalGAP $\alpha$ 1/ $\beta$  and RalA/B in OA-treated L6 myotubes. n = 4. (L) Levels of GTP-bound active RalA and RalB in L6 myotubes treated with or without oleic acid (OA) in the presence or absence of RalGAP $\alpha$ 1 down-regulation via siRNA. (M-N) Uptake of glucose (M) or

LCFA (N) in OA-treated L6 myotubes in response to insulin.  $n = 6$ . † indicates  $p < 0.001$  (– OA insulin vs – OA basal), and ‡ indicates  $p < 0.05$  for glucose uptake (+ OA insulin vs + OA basal) or  $p < 0.001$  for LCFA uptake (+ OA insulin vs + OA basal). The data are given as the mean  $\pm$  SEM. \* indicates  $p < 0.05$ , \*\*  $p < 0.01$  and \*\*\*  $p < 0.001$ . ns, not significant.

### Supple. Fig. 3

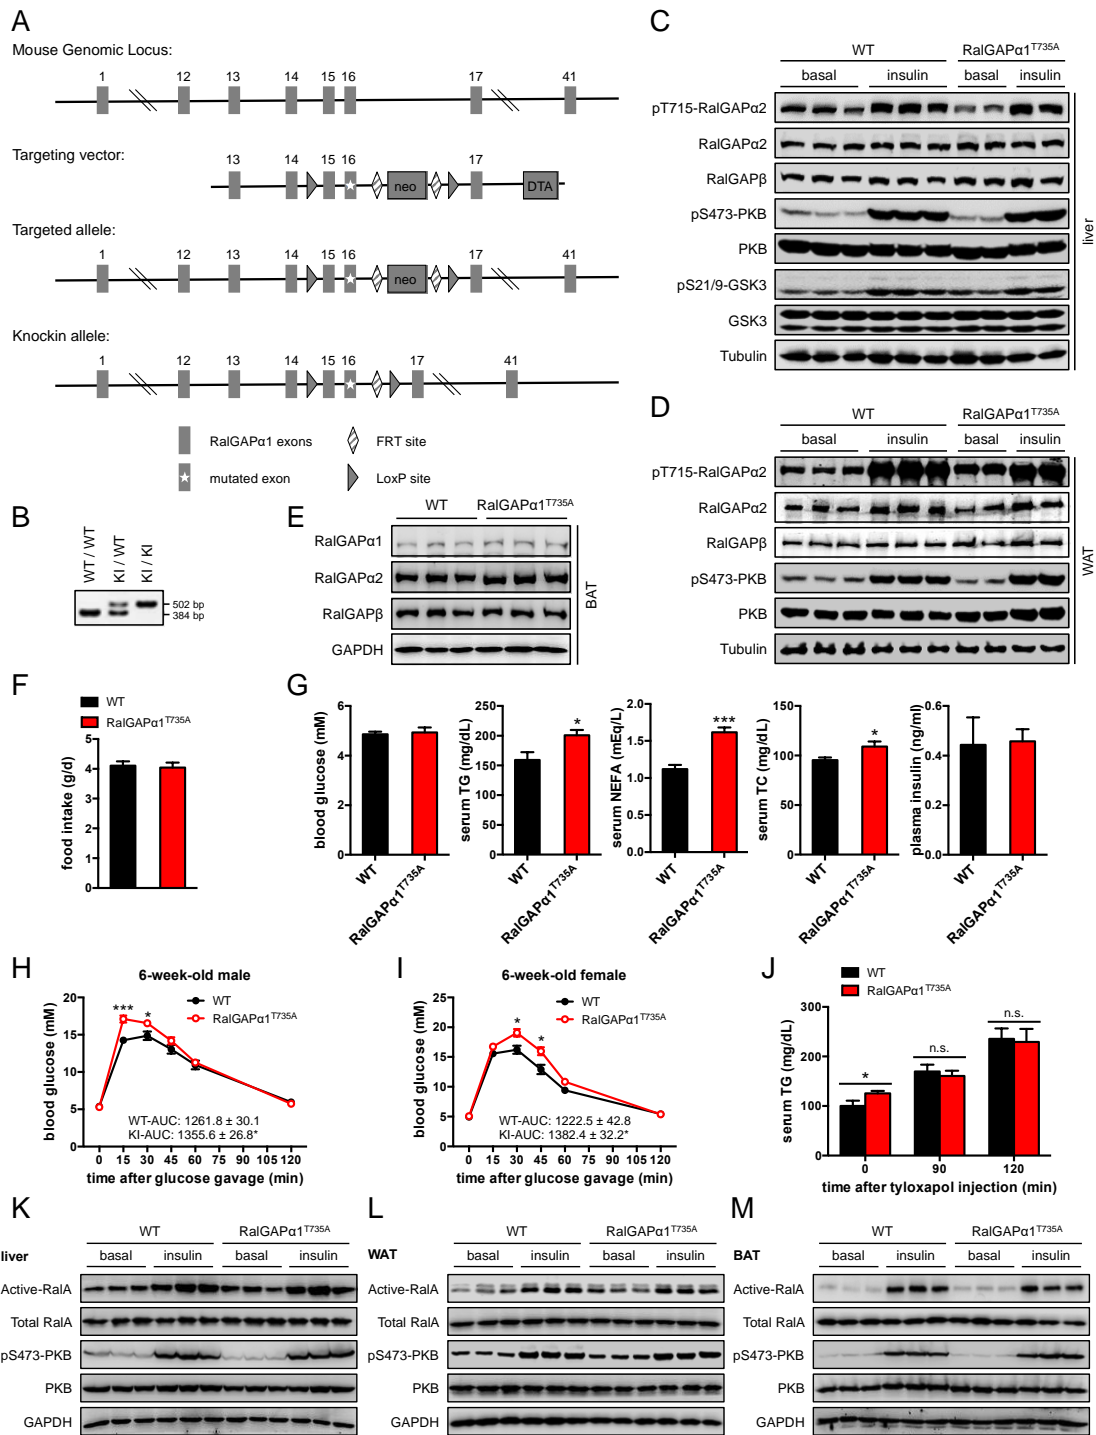

**Fig. S3. Generation and characterization of the RalGAP $\alpha$ 1<sup>Thr735Ala</sup> knock-in mice.** (A) Diagrammatic illustration of the strategy for generation of the RalGAP $\alpha$ 1<sup>Thr735Ala</sup> knockin mice. (B) PCR-based genotyping of the RalGAP $\alpha$ 1<sup>Thr735Ala</sup> knockin mice. (C-D) Phosphorylation and expression of RalGAP $\alpha$ 2 and other key components of insulin-PKB pathway in the liver (C) and WAT (D) of the wild-type and RalGAP $\alpha$ 1<sup>Thr735Ala</sup> knockin mice (2-month-old) in response to insulin. (E) Expression of RalGAP $\alpha$ 1, RalGAP $\alpha$ 2 and RalGAP $\beta$  in the BAT of wild-type and



RalGAP $\alpha$ 1<sup>Thr735Ala</sup> knockin mice (2-month-old). **(F)** Food intake of the male wild-type and RalGAP $\alpha$ 1<sup>Thr735Ala</sup> knockin mice (3-month-old).  $n = 7-8$ . **(G)** Blood glucose, plasma insulin, TG, NEFA and TC in the overnight-fasted male WT and RalGAP $\alpha$ 1<sup>Thr735Ala</sup> knockin mice at the age of 7-8 weeks.  $n = 8-9$ . **(H-I)** Oral glucose tolerance test in the male (H) or female (I) wild-type and RalGAP $\alpha$ 1<sup>Thr735Ala</sup> knockin mice at age of 6 weeks. The values show the glucose area under the curve during glucose tolerance test.  $n = 5-7$ . **(J)** Serum TG levels in the overnight-fasted WT and RalGAP $\alpha$ 1<sup>Thr735Ala</sup> knockin male mice (5-month-old) upon administration of tyloxapol via intraperitoneal injection.  $n = 7-8$ . **(K-M)** Levels of GTP-bound active RalA in the liver (K), WAT (L) and BAT (M) of the wild-type and RalGAP $\alpha$ 1<sup>Thr735Ala</sup> knockin mice (2-month-old) in response to insulin. The data are given as the mean  $\pm$  SEM. \* indicates  $p < 0.05$ , and \*\*\*  $p < 0.001$ . ns, not significant.

Supple. Fig. 4

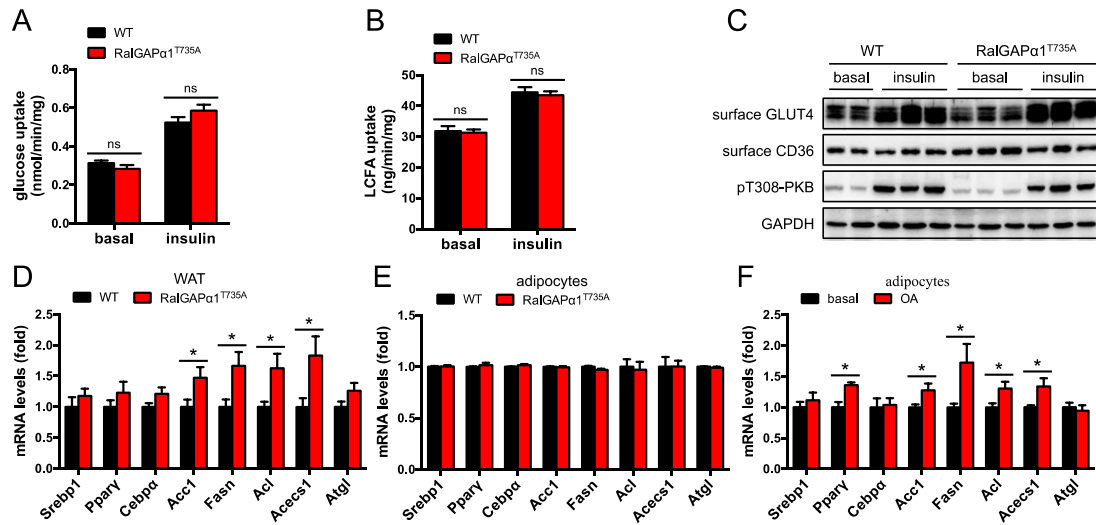

**Fig. S4. Uptake of glucose and LCFAs and expression of genes for lipid**

**metabolism in adipose tissues and primary adipocytes.** (A-B) Uptake of glucose (A) or LCFA (B) in primary brown adipocytes in response to insulin.  $n = 6$ . (C) Cell surface GLUT4 and CD36 in the BAT in response to insulin. Subcellular fractionation was performed in the BAT, and GLUT4 and CD36 on the plasma membrane were detected via western blot. (D) mRNA levels of genes for lipid metabolism in the WAT of WT and RalGAP $\alpha$ 1<sup>Thr735Ala</sup> knockin male mice at the age of 2 months.  $n = 6$ . (E) mRNA levels of genes for lipid metabolism in primary white adipocytes from WT and RalGAP $\alpha$ 1<sup>Thr735Ala</sup> knockin male mice.  $n = 4-6$ . (F) mRNA levels of genes for lipid metabolism in wild-type primary white adipocytes treated with or without OA.  $n = 5$ . The data are given as the mean  $\pm$  SEM. \* indicates  $p < 0.05$ . ns, not significant.

## Supple. Fig. 5

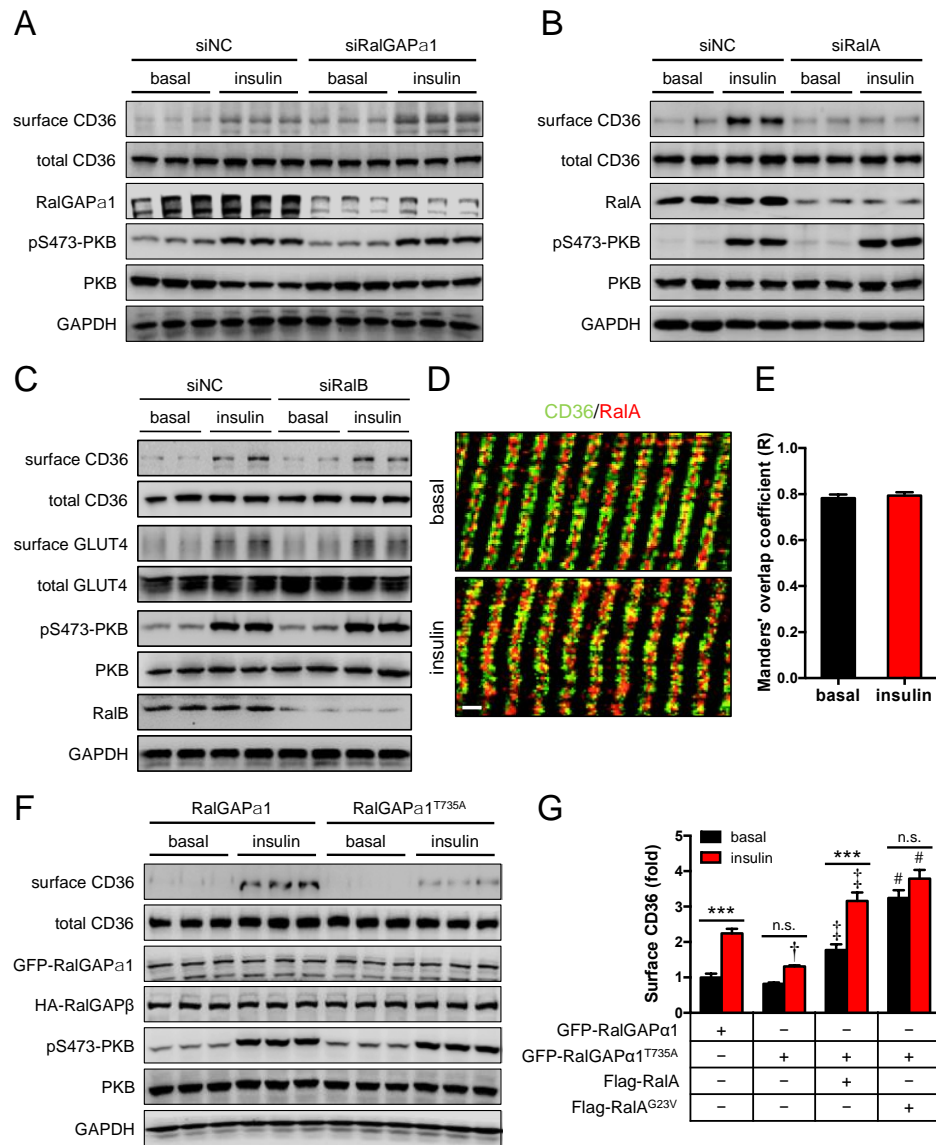

**Fig. S5. Cell surface and total CD36 in L6 myotubes.** (A) Cell surface and total CD36 in L6 myotubes upon knockdown of RalGAP $\alpha$ 1 via siRNA. Cells were treated with or without insulin. (B) Cell surface and total CD36 in L6 myotubes upon knockdown of RalA via siRNA. Cells were treated with or without insulin. (C) Cell surface and total CD36 in L6 myotubes upon knockdown of RalB via siRNA. Cells were treated with or without insulin. (D-E) Immunostaining of CD36 and RalA in mouse soleus muscle in response to insulin. Mouse anti-CD36 and Rabbit anti-RalA antibodies were used in the immunostaining. Colocalization of CD36 and RalA (Manders' overlap coefficient) was determined using Image-Pro Plus, and shown in

E.  $n = 16$ . (F) Cell surface and total CD36 in L6 myotubes overexpressing RalGAP $\alpha$ 1 WT or Thr735Ala mutant proteins. Cells were treated with or without insulin. (G) Cell surface and total CD36 levels in L6 myotubes overexpressing wild-type or mutant GFP-RalGAP $\alpha$ 1 proteins in the presence or absence of overexpression of wild-type or mutant Flag-RalA proteins. Cells were stimulated with or without insulin. Representative blots were shown in Fig. 3J. Quantitative data of cell surface CD36 that were normalized to total CD36 were shown here.  $n = 4$ . † indicates  $p < 0.05$  (RalGAP $\alpha$ 1<sup>T735A</sup> alone insulin vs RalGAP $\alpha$ 1 alone insulin). ‡ indicates  $p < 0.01$  (RalA/RalGAP $\alpha$ 1<sup>T735A</sup> basal vs RalGAP $\alpha$ 1<sup>T735A</sup> alone basal) or  $p < 0.001$  (RalA/RalGAP $\alpha$ 1<sup>T735A</sup> insulin vs RalGAP $\alpha$ 1<sup>T735A</sup> alone insulin). # indicates  $p < 0.001$  (RalA<sup>G23V</sup>/RalGAP $\alpha$ 1<sup>T735A</sup> basal vs RalGAP $\alpha$ 1<sup>T735A</sup> alone basal) or  $p < 0.001$  (RalA<sup>G23V</sup>/RalGAP $\alpha$ 1<sup>T735A</sup> insulin vs RalGAP $\alpha$ 1<sup>T735A</sup> alone insulin). The data are given as the mean  $\pm$  SEM. \*\*\* indicates  $p < 0.001$ . ns, not significant.

Supple. Fig. 6

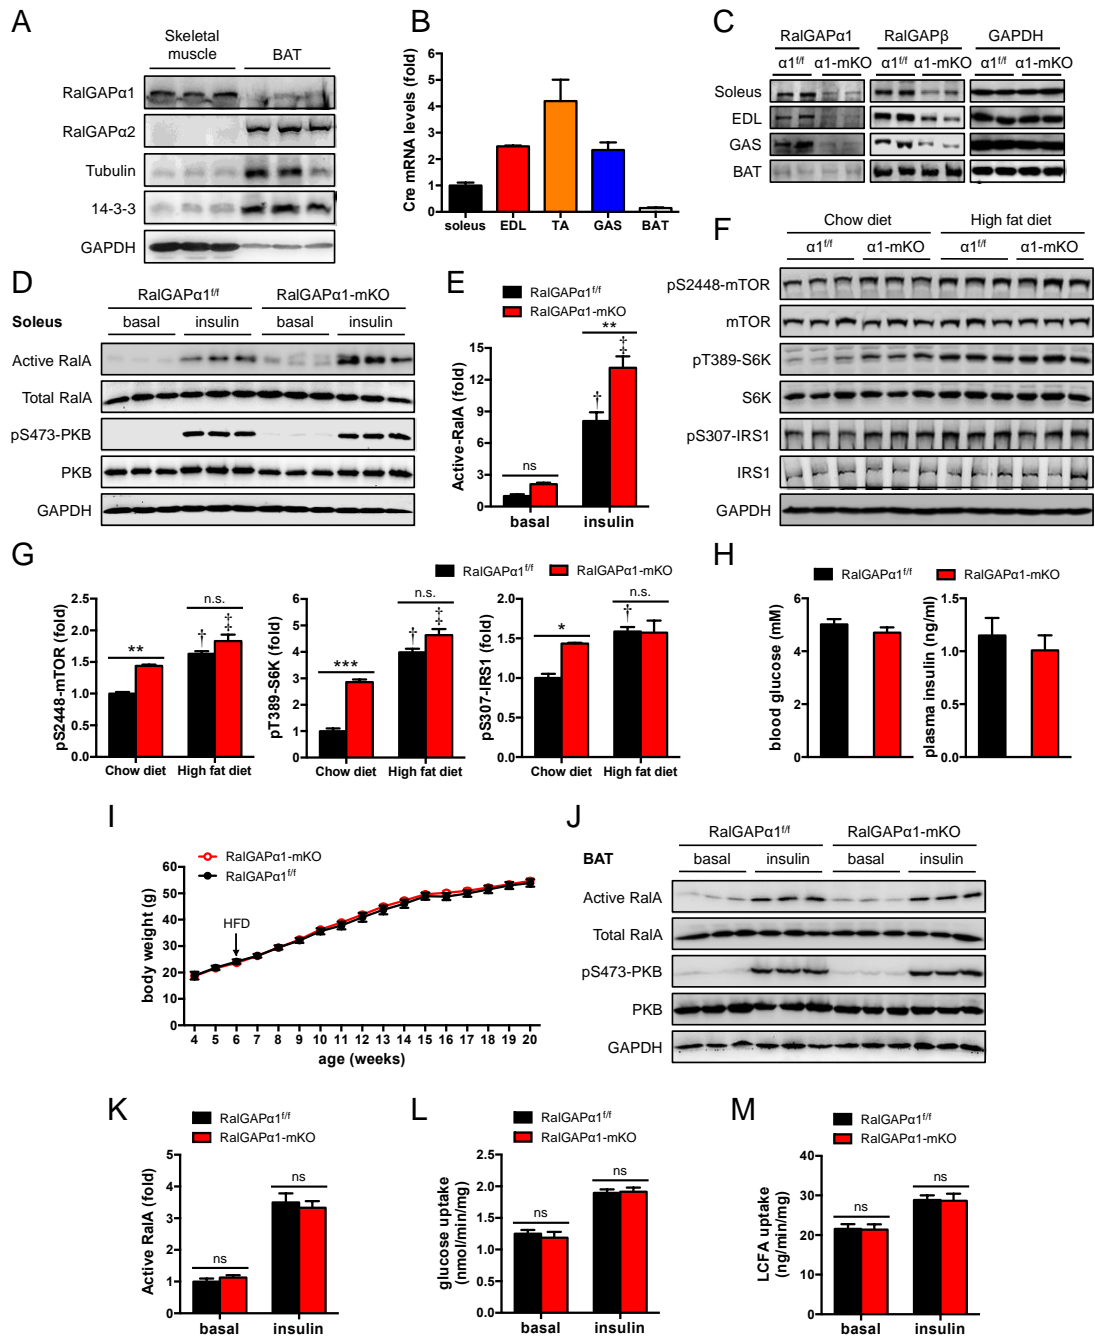

**Fig. S6. Characterization of RalGAP $\alpha$ 1-mKO mice.** (A) Protein expression of RalGAP $\alpha$ 1 and RalGAP $\alpha$ 2 in mouse gastrocnemius muscle and BAT. 40  $\mu$ g of tissue lysates were loaded for each lane. (B) mRNA levels of Cre recombinase in different skeletal muscle and BAT of the Mlc1f-Cre mice. n = 3-4. (C) Expression of RalGAP $\alpha$ 1 and RalGAP $\beta$  in different skeletal muscle and BAT from the male RalGAP $\alpha$ 1-mKO mice (3-month-old). (D-E) GTP-bound active RalA in soleus

muscle of the male RalGAP $\alpha$ 1-mKO mice (3-month-old) in response to insulin. Active RalA in the blots shown in D were quantified in E. n = 3. † and ‡ indicate  $p < 0.001$  (insulin vs basal). **(F-G)** Phosphorylation and expression of mTOR, S6K and IRS1 in skeletal muscle of the RalGAP $\alpha$ 1-mKO male mice fed on chow or high fat diet. Blots in F were quantified in G. For pS2448-mTOR, † indicates  $p < 0.001$  (RalGAP $\alpha$ 1<sup>f/f</sup> High fat diet vs RalGAP $\alpha$ 1<sup>f/f</sup> Chow diet), and ‡ indicates  $p < 0.01$  (RalGAP $\alpha$ 1-mKO High fat diet vs RalGAP $\alpha$ 1-mKO Chow diet). For pT389-S6K, † and ‡ indicate  $p < 0.001$  (High fat diet vs Chow diet). For pS307-IRS1, † indicates  $p < 0.01$  (RalGAP $\alpha$ 1<sup>f/f</sup> High fat diet vs RalGAP $\alpha$ 1<sup>f/f</sup> Chow diet). **(H)** Blood glucose in the overnight fasted RalGAP $\alpha$ 1<sup>f/f</sup> and RalGAP $\alpha$ 1-mKO male mice at the age of 8 weeks. Plasma insulin in the RalGAP $\alpha$ 1<sup>f/f</sup> and RalGAP $\alpha$ 1-mKO male mice fed *ad libitum* at the age of 5 months. n = 7-8. **(I)** Body weight of the RalGAP $\alpha$ 1<sup>f/f</sup> and RalGAP $\alpha$ 1-mKO male mice fed on high fat diet. n = 7-10. **(J-K)** Levels of GTP-bound active RalA in the BAT of male RalGAP $\alpha$ 1-mKO mice (3-month-old) in response to insulin. Blots shown in J were quantified in K. n = 3. **(L-M)** Uptake of glucose (L) or LCFA (M) in primary brown adipocytes in response to insulin. n = 5-6. The data are given as the mean  $\pm$  SEM. \* indicates  $p < 0.05$ , \*\*  $p < 0.01$  and \*\*\*  $p < 0.001$ . ns, not significant.

Supple. Fig. 7

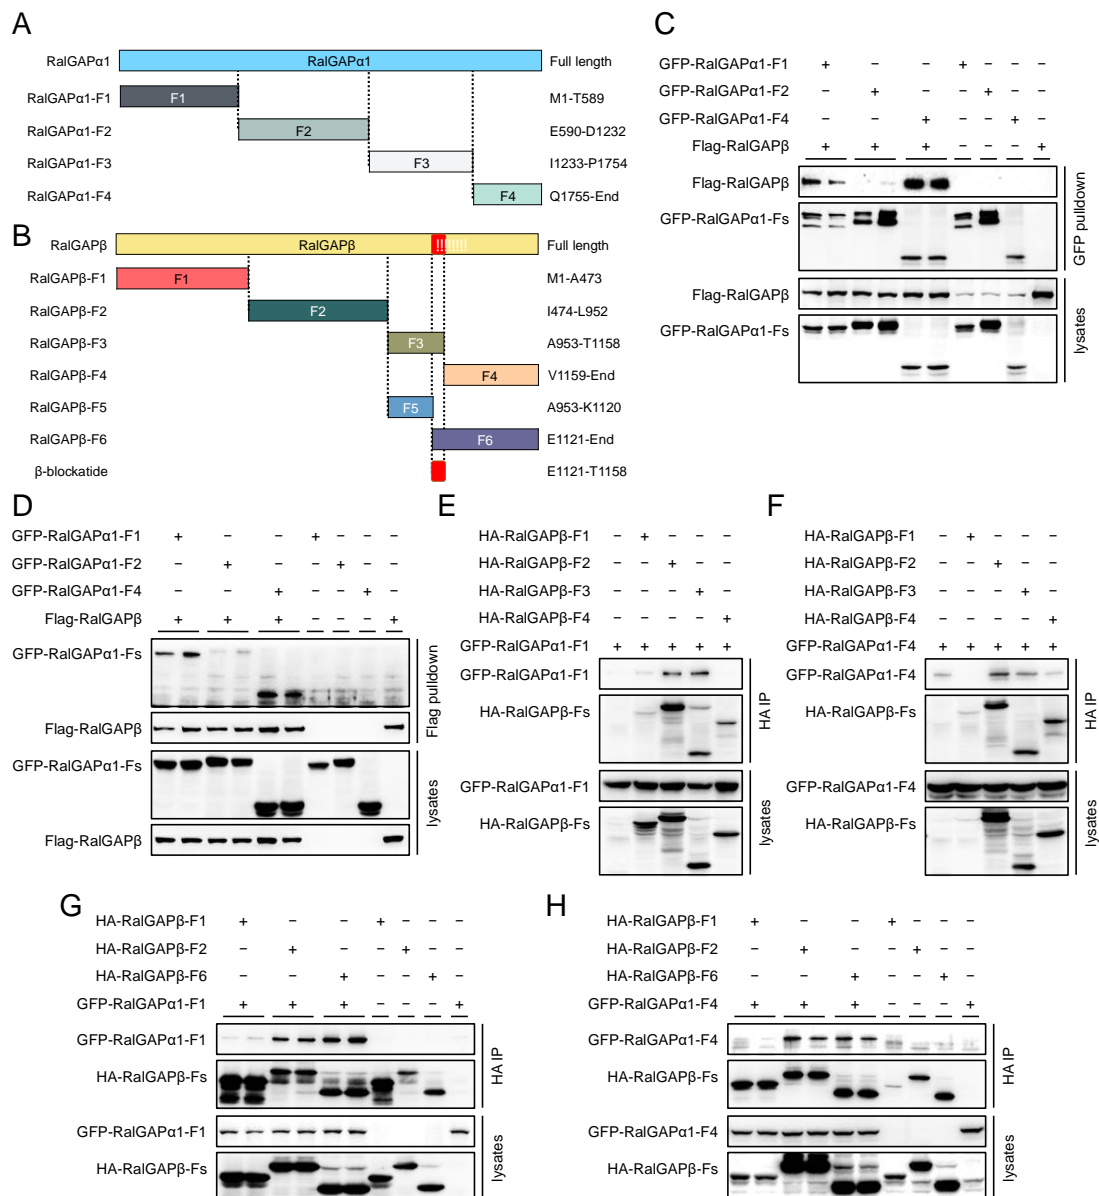

**Fig. S7. Mapping of interaction domains on RalGAPα1 and RalGAPβ.** (A-B) Diagrammatic illustration of fragments of RalGAPα1 (A) and RalGAPβ (B) for mapping of interaction domains between these two proteins. (C-D) Mapping of regions on RalGAPα1 that interact with RalGAPβ. GFP-tagged RalGAPα1 fragments were co-expressed with Flag-tagged RalGAPβ. C, Flag-RalGAPβ was detected via immunoblotting in the immunoprecipitates of GFP-tagged RalGAPα1 fragments. D, GFP-tagged RalGAPα1 fragments were detected via immunoblotting in the immunoprecipitates of Flag-RalGAPβ. (E-H) Mapping of regions on RalGAPβ that

interact with RalGAP $\alpha$ 1. HA-tagged RalGAP $\beta$  fragments were co-expressed with GFP-tagged RalGAP $\alpha$ 1-F1 (E and G) or RalGAP $\alpha$ 1-F4 (F and H). GFP-tagged RalGAP $\alpha$ 1 fragments were detected via immunoblotting in the immunoprecipitates of HA-tagged RalGAP $\beta$  fragments.

### Supple. Fig. 8

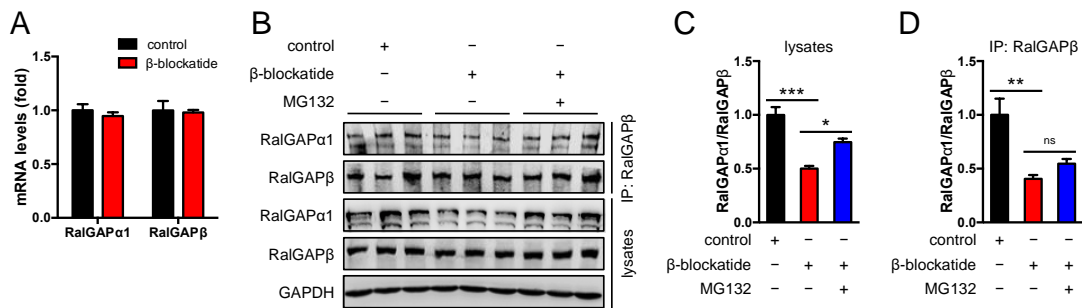

**Fig. S8. Expression, degradation, and interaction of RalGAP $\alpha$ 1 and RalGAP $\beta$  in L6 myotubes expressing  $\beta$ -blockatide.** (A) mRNA levels of endogenous RalGAP $\alpha$ 1 and RalGAP $\beta$  in L6 myotubes expressing the  $\beta$ -blockatide. Cells transfected with an empty vector were used as control.  $n = 6$ . (B-D) Protein expression and interaction of RalGAP $\alpha$ 1 and RalGAP $\beta$  in L6 myotubes expressing the  $\beta$ -blockatide. Myotubes were treated with or without MG132 for 4 h before lysis. Cells transfected with an empty vector were used as control. Endogenous RalGAP $\beta$  was immunoprecipitated using the anti-RalGAP $\beta$  antibody, and RalGAP $\alpha$ 1 was detected in the immunoprecipitates via immunoblotting. C, quantitation of RalGAP $\alpha$ 1 in cell lysates. D, quantitation of RalGAP $\alpha$ 1 in RalGAP $\beta$  immunoprecipitates. RalGAP $\alpha$ 1 signals were normalized with RalGAP $\beta$  in cell lysates or immunoprecipitates.  $n = 3$ . The data are given as the mean  $\pm$  SEM. ns, not significant.
